# Supplementary material for: Folate binding protein: therapeutic natural nanotechnology for folic acid, methotrexate, and leucovorin
Source: Royal Society of Chemistry journal article supplement (doi:10.1039/c6nr09060e), 2017-01-01
Supplement: c6nr09060e1.pdf [file c6nr09060e1.pdf]

## Supporting Information

### **Folate binding protein: Therapeutic natural nanotechnology for folic acid, methotrexate, and leucovorin**

Rachel L. Merzel<sup>a</sup>, Sarah M. Boutom<sup>a</sup>, Junjie Chen<sup>a</sup>, Carolina Frey<sup>a</sup>, Kerby Shedden<sup>b</sup>, E. Neil G. Marsh<sup>a,c</sup>, and Mark M. Banaszak Holl<sup>\*a,d,e</sup>

<sup>a</sup>Department of Chemistry, <sup>b</sup>Department of Statistics, <sup>c</sup>Department of Biological Chemistry, <sup>d</sup>Department of Biomedical Science and Engineering, <sup>e</sup>Program in Macromolecular Science and Engineering  
University of Michigan, Ann Arbor, Michigan 48109

#### **Contents**

- I. Statistical analysis of 0.2 nM FBP nanoparticles
- II. Close-up AFM images of FBP and FBP + FA nanoparticles
- III. Full statistical of 2 nM FA + 2 nM FBP nanoparticles
- IV. Titration of FBP into folic acid
- V. Atomic force microscopy (AFM) images (methotrexate and leucovorin nanoparticles)
- VI. TANGO analysis output
- VII. FBP purification data (SDS-PAGE and MALDI-TOF MS)
- VIII. Data on pH dependence of FBP aggregation

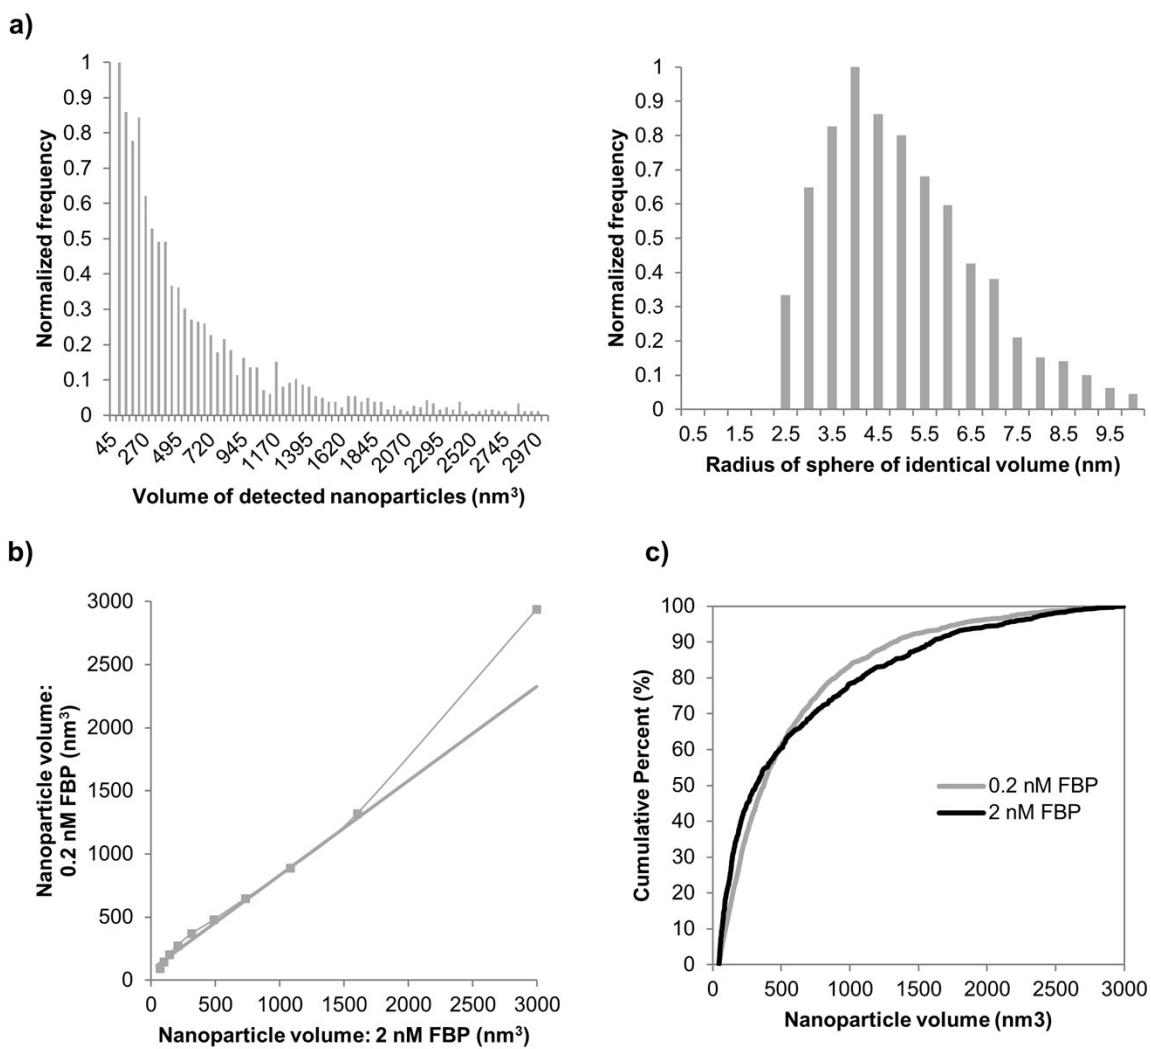

**Figure S1.** a) Histograms; b) QQ plots; c) and CDF plots for the FBPNP formed from 0.2 nM FBP. The K-S test comparing FBPNP at 0.2 nM and 2 nM protein rejected the null hypothesis, indicating the two nanoparticle populations are statistically different.

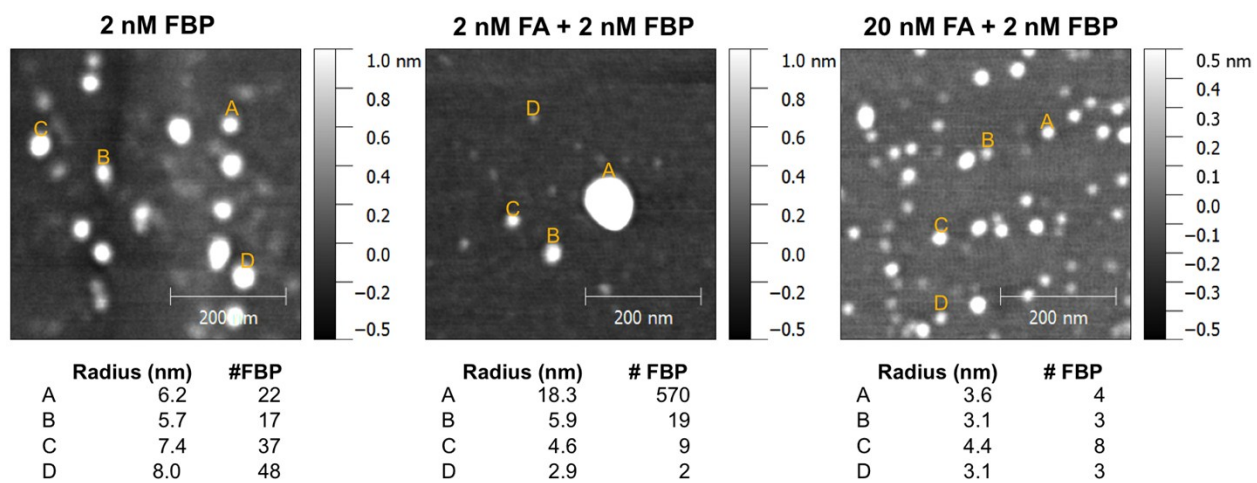

**Figure S2.** Representative detailed frames of AFM images showing FBP nanoparticles. Idealized spherical radii and the number of FBP comprising each selected nanoparticle are provided.

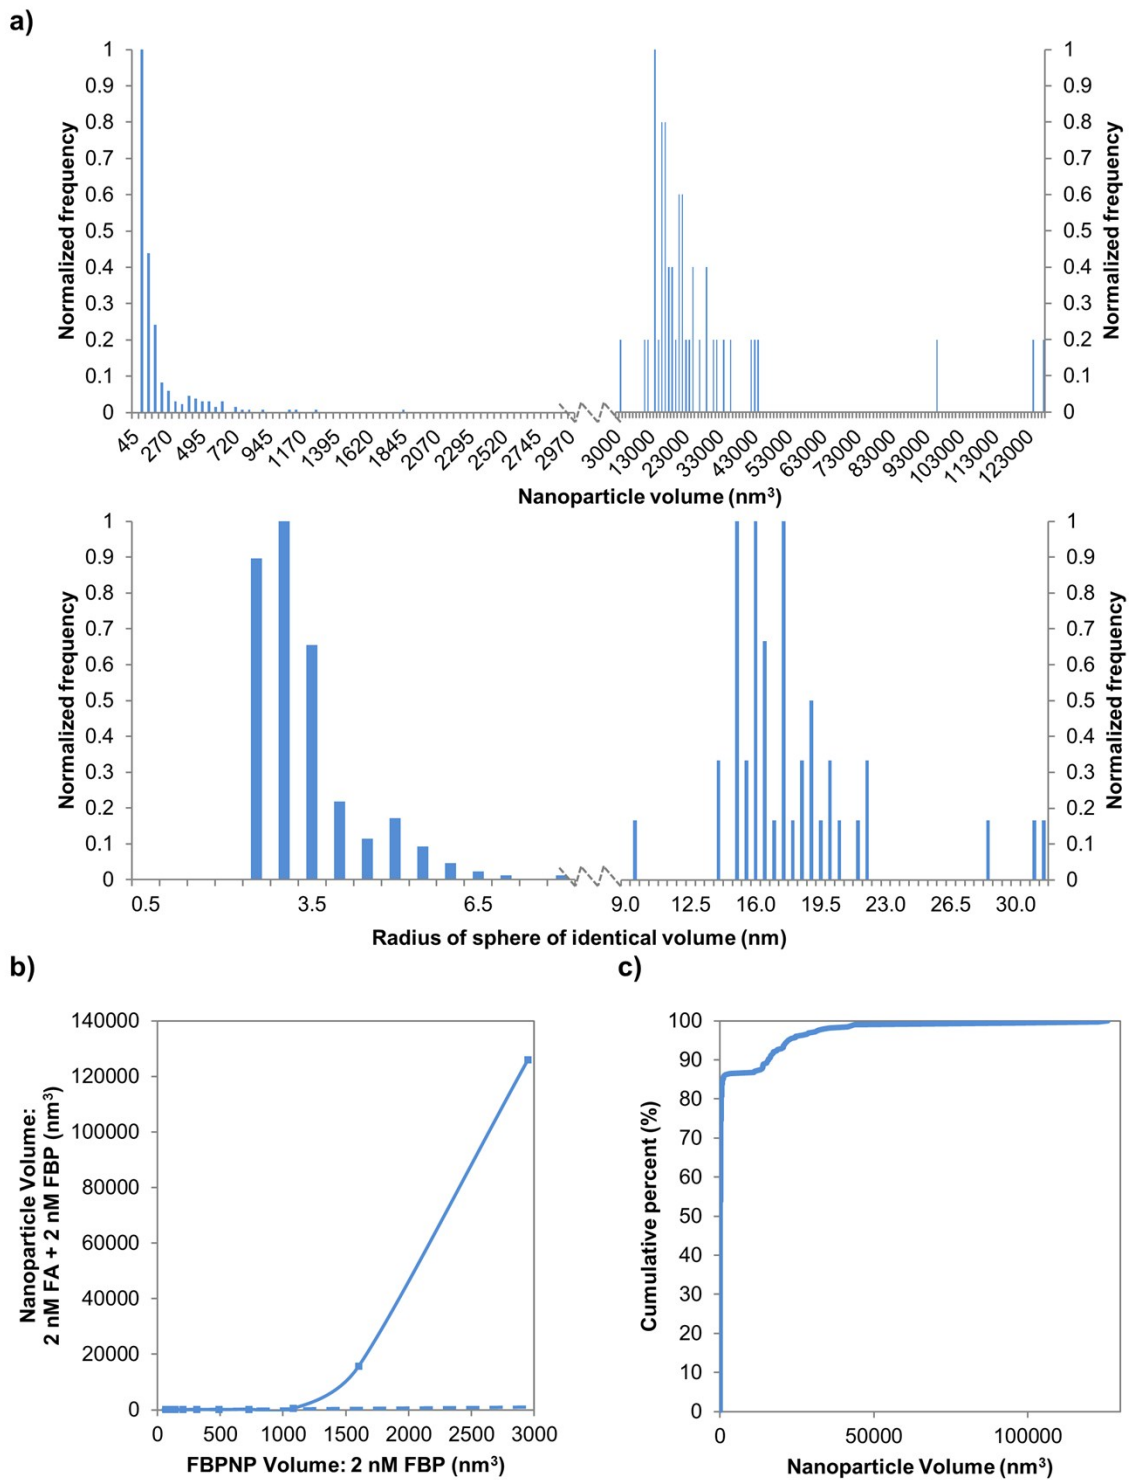

**Figure S3.** Histograms, QQ plots, and CDF plots of the full data set of FBPNP formed from 2 nM FA + 2 nM FBP demonstrating the bimodal distribution of FBPNP volumes.

## Titration of FBP into folic acid

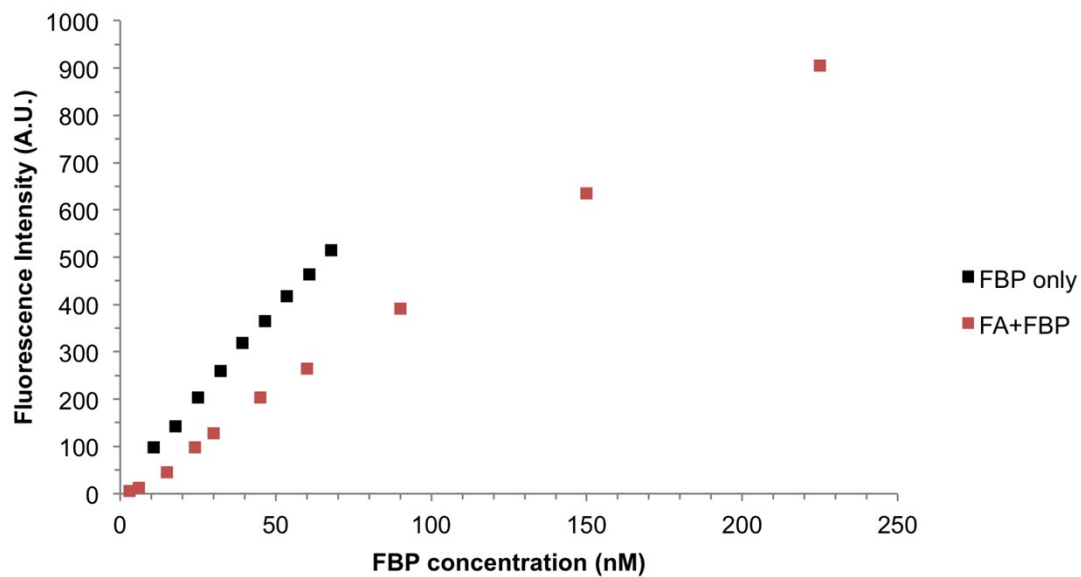

**Figure S4.** Titration of FBP into FA (30 nM). Tryptophan fluorescence was excited at 280 nm and emission detected at 340 nm. The flatter slope of the ligated FBP fluorescence is suggests asymmetrical aggregation of apo- and holo-FBP.

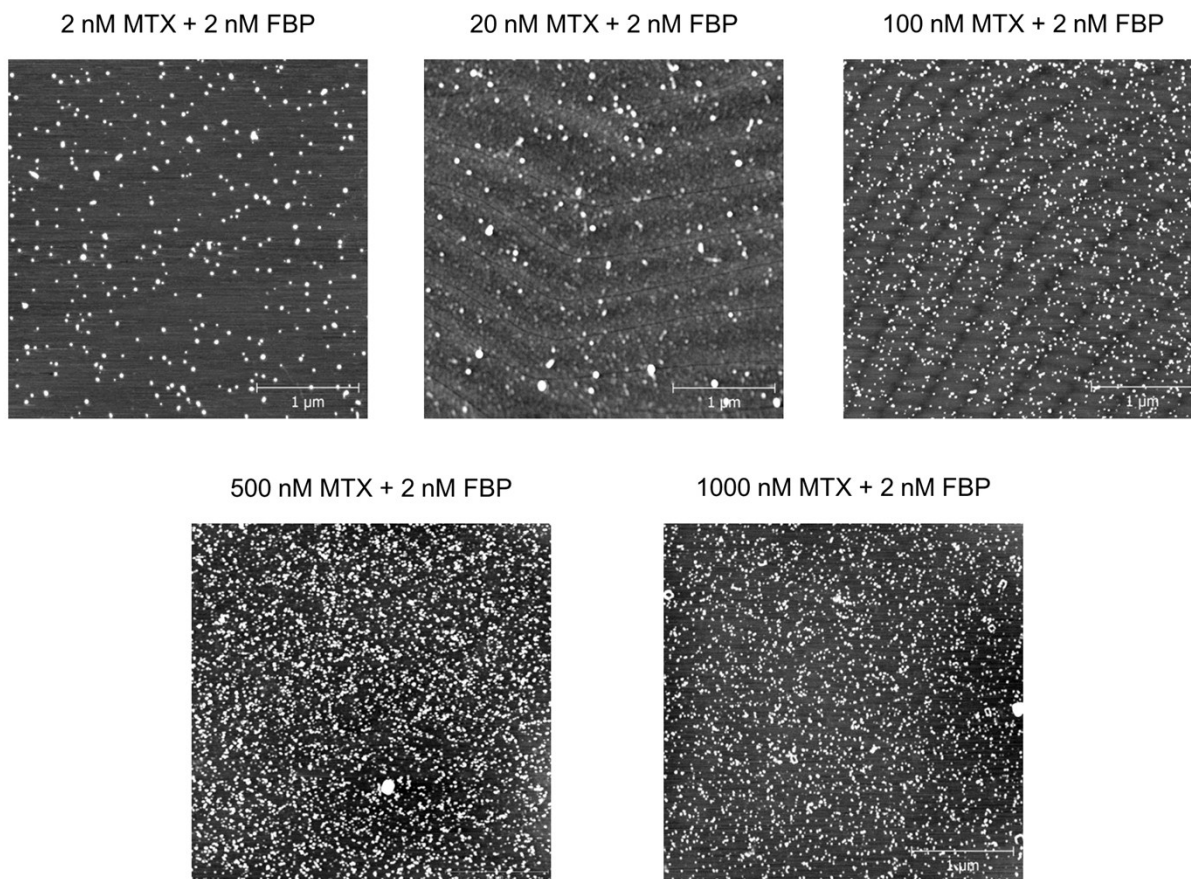

**Figure S5.** AFM images of FBPNP formed from a range of MTX:FBP ratios. For all samples, the FBP concentration was held constant at 2 nM in 1x PBS. AFM images were captured by spin coating the solutions onto freshly-cleaved mica.

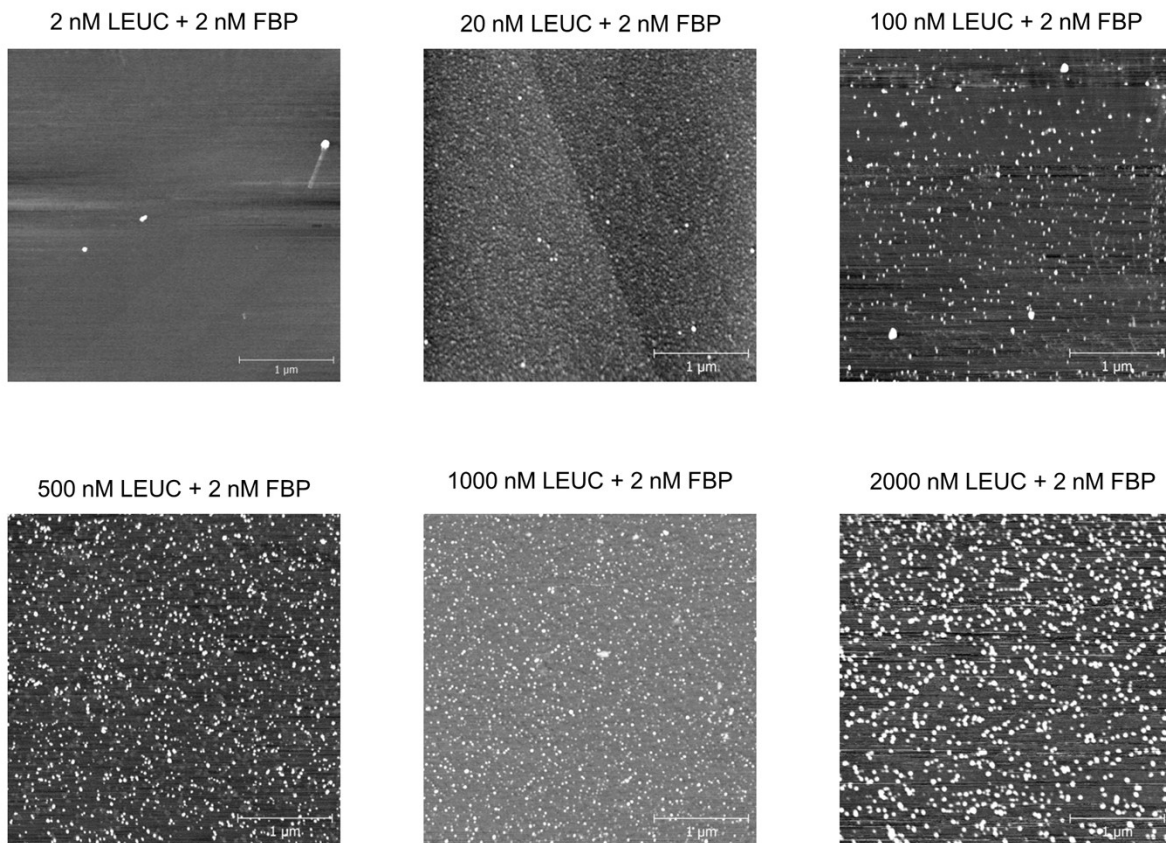

**Figure S6.** AFM images of FBNP formed from a range of LEUC:FBP ratios. For all samples, the FBP concentration was held constant at 2 nM in 1x PBS. AFM images were captured by spin coating the solutions onto freshly-cleaved mica.

# Tango Plot

Thu May 07 23:18:48 CEST 2015

Provided by :  
Centre de Regulacio Genomica  
Serrano group

## Beta aggregation

pH = 7.4  
Temperature = 298.15  
Ionic Strength = 0.02  
Nterm = No Protection

Cterm = No Protection

## Peptide :

```
MAWQMTQLLLLALVAAAWGAQAPRTPRARTDLLNVCMDAKHHKAEPGPED  
SLHEQCSPWRKNACCSVNTSIEAHKDISYLRFNWDHCGKMEPACKRHF  
QDTCLYECSPNLGPWIREVNQRWRKERVLGVPLCKEDCQSWWEDCRTSYT  
CKSNWHKGGWNWTSGYNQCPVKAACHRFDFYFPTPAALCNEIWSHSYKVS  
YSRSGRCCIQMWFDPFQGNPNEEVARFYAENPTSGSTPQGI
```

## Plot :

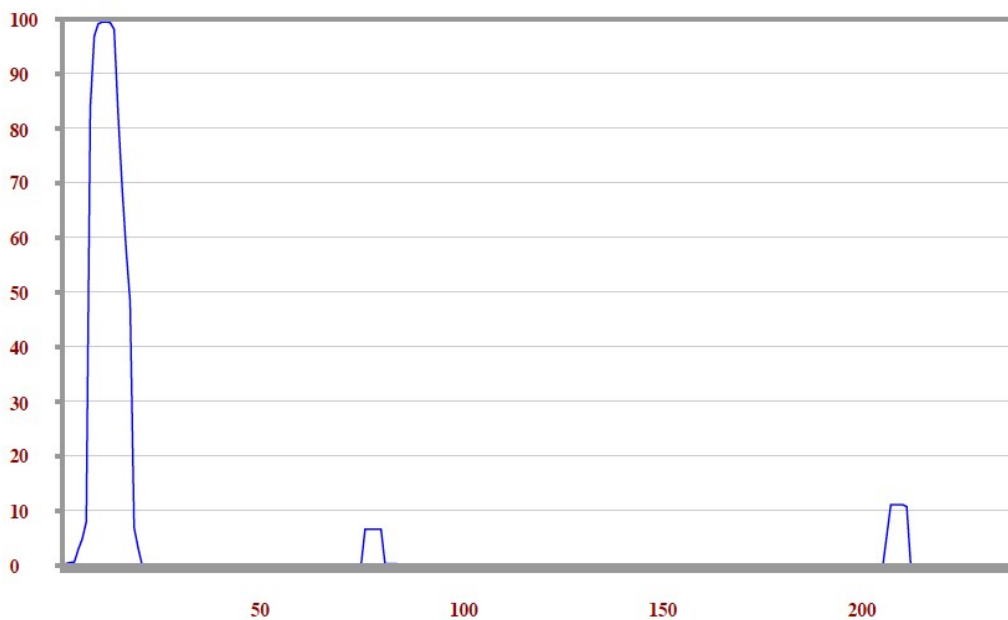

**Figure S7.** TANGO output for bovine apo-FBP (P02702). The N-terminus 8-18 LLLLALVAAAW sequence has ~99% aggregation tendency at 10  $\mu$ M (the lowest concentration with which the code is compatible).



# Tango Plot

Thu May 07 23:28:35 CEST 2015

Provided by :  
Centre de Regulacio Genomica  
Serrano group

## Beta aggregation

pH = 7  
Temperature = 298.15  
Ionic Strength = 0.02  
Nterm = No Protection

Cterm = No Protection

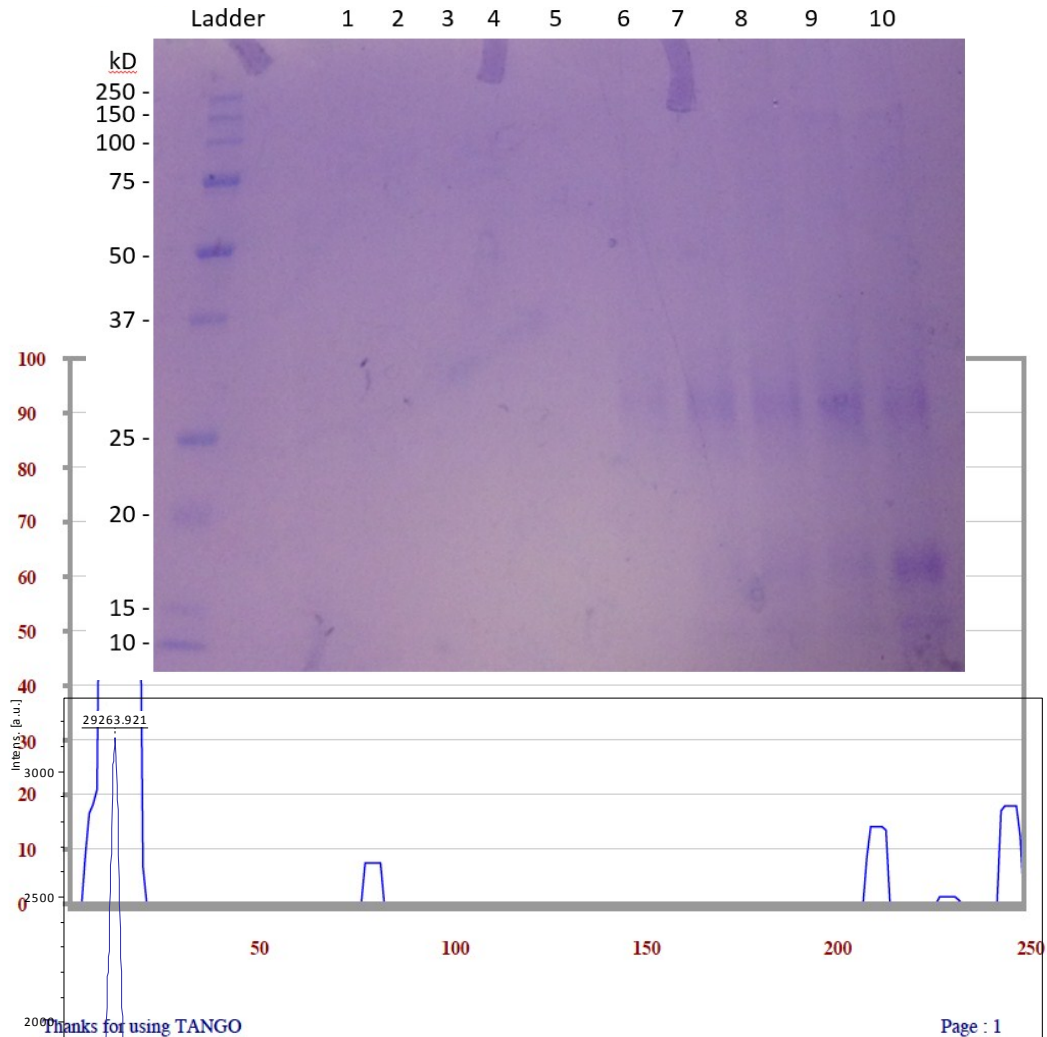

**Figure S8.** TANGO output for human apo-hFR $\alpha$ (P02702)+FA. The N-terminus 9-19 LLLLVWVAVV sequence has ~99% aggregation tendency at 10  $\mu$ M (the lowest concentration with which the code is compatible).

**Figure S9.** SDS-PAGE and MALDI of FBP. The protein were collected by fractions and the ~29kDa fractions were pooled together. The FBP exhibited a molecular weight distribution around ~29kDa because of glycosylation at residue 68N and 160N.



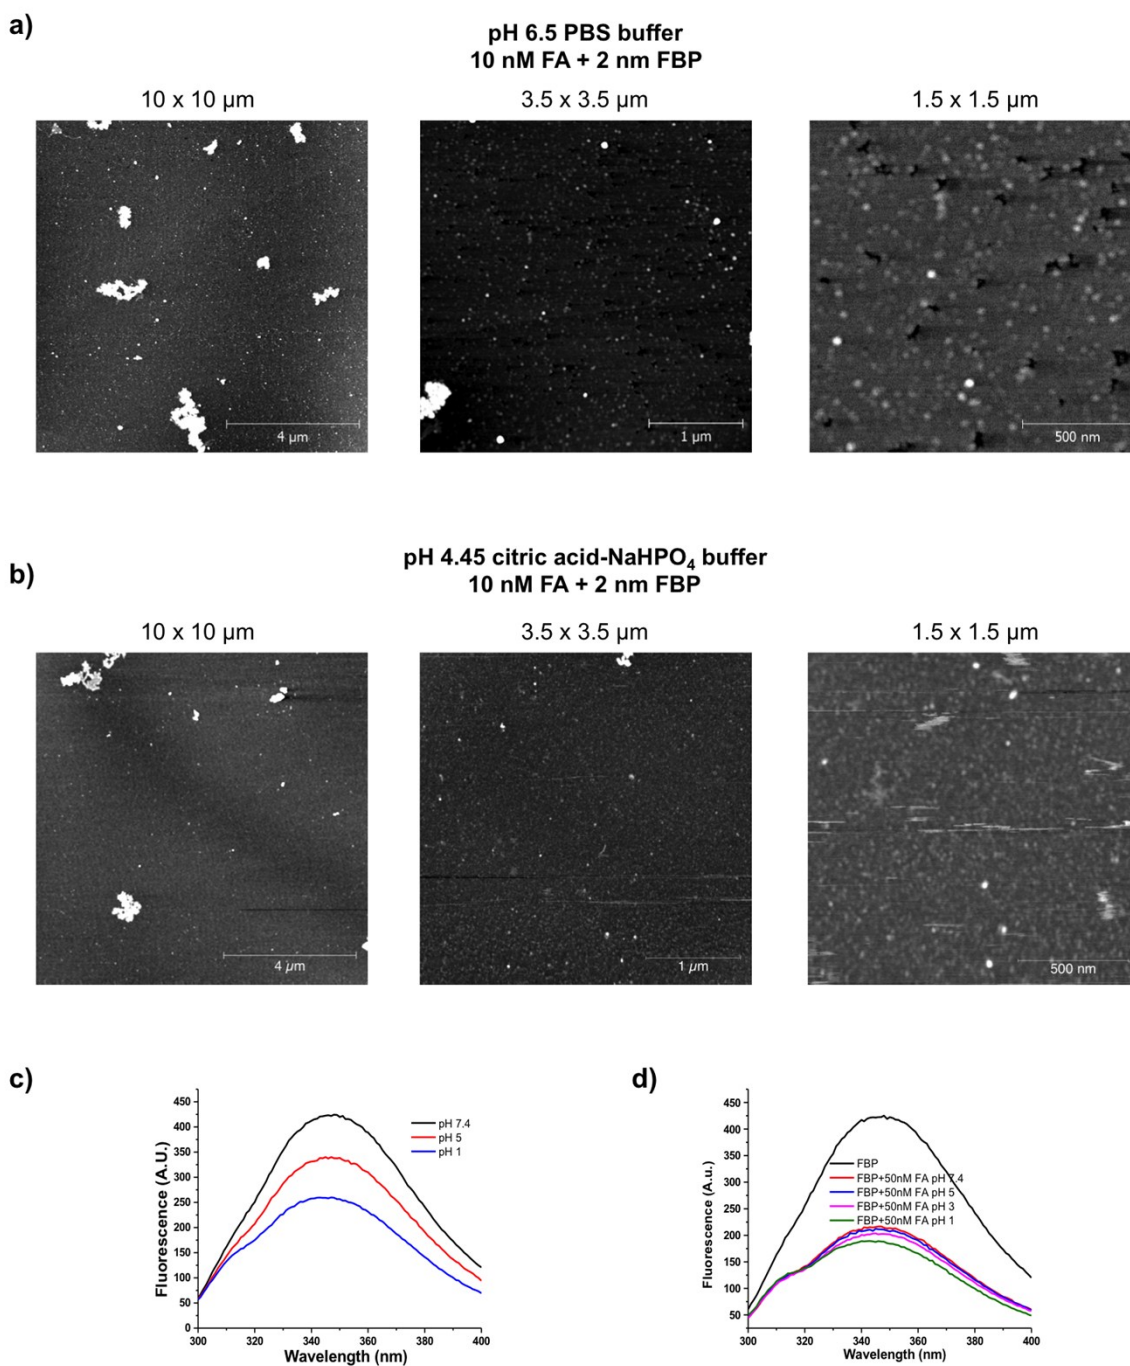

**Figure S10.** a) AFM images of 10 nM FA + 2 nM FBP at pH 6.5; b) AFM images of 10 nM FA + 2 nM FBP at pH 4.45. Images in both (a) and (b) show substantially less nanoparticle formation as compared to FA+FBP solution at pH 7.4; c) Tryptophan fluorescence of FBP over a range of pH values ([FBP] = 58 nM); d) Tryptophan fluorescence of FBP (58 nM) in the presence of FA (50 nM). excitation: 280 nm; emission: 340 nm
